# Supplementary material for: Improving Learning and Study Strategies in Undergraduate Medical Students: A Pre-Post Study
Source: MDPI journal article supplement (doi:10.3390/healthcare11030375), 2023-01-28

## Improving Learning and STUDY Strategies in Undergraduate Medical Students: A

### Pre-Post Study

**Supplementary Table S1.** Comparison between study participants that completed the UKASP compared to those who lost to follow-up (LTFU)

| Characteristic                          | No LTFU<br>n=64  | LTFU<br>n=14     | <i>p</i> -Value* |
|-----------------------------------------|------------------|------------------|------------------|
| Age (yr), median (IQR)                  | 21 (21-22)       | 21 (21-22)       | 0.86             |
| Sex, n (%)                              |                  |                  |                  |
| Female                                  | 42 (65.6)        | 9 (64.3)         | 1                |
| Marital status, n (%)                   |                  |                  | 0.49             |
| Single                                  | 47 (73.4)        | 12 (85.7)        |                  |
| Relationship                            | 17 (26.6)        | 2 (14.3)         |                  |
| Married                                 | 0 (0)            | 0 (0)            |                  |
| Occupational status, n (%)              |                  |                  | 1                |
| Yes                                     | 4 (6.2)          | 1 (7.1)          |                  |
| Living arrangements, n (%)              |                  |                  | 0.63             |
| Alone                                   | 9 (14.1)         | 1 (7.1)          |                  |
| Rommate                                 | 8 (12.5)         | 3 (21.4)         |                  |
| Family                                  | 47 (73.4)        | 10 (71.4)        |                  |
| Parenthood, n (%)                       |                  |                  | 1                |
| Yes                                     | 1 (1.6)          | 0 (0)            |                  |
| Medical parents, n (%)                  |                  |                  | 0.68             |
| Yes                                     | 10 (15.6)        | 1 (7.1)          |                  |
| High school attended, n (%)             |                  |                  | 1                |
| Public                                  | 6 (9.4)          | 1 (7.1)          |                  |
| Private secular                         | 47 (73.4)        | 11 (78.6)        |                  |
| Religious                               | 8 (12.5)         | 2 (14.3)         |                  |
| Municipal                               | 3 (4.7)          | 0 (0)            |                  |
| College degree before Med School, n (%) |                  |                  | 0.45             |
| Yes                                     | 2 (3.1)          | 1 (7.1)          |                  |
| English level perception, n (%)         |                  |                  | 0.68             |
| Basic                                   | 5 (7.8)          | 2 (14.3)         |                  |
| Intermediate                            | 29 (45.3)        | 5 (35.7)         |                  |
| Avanced                                 | 30 (46.9)        | 7 (50)           |                  |
| GPA medicine/4, median (IQR)            | 3.28 (3.14-3.46) | 3.34 (3.18-3.61) | 0.42             |
| Pasteur scholarship, n (%)              |                  |                  | 1                |
| Yes                                     | 6 (9.4)          | 1 (7.1)          |                  |
| Financial assistantship, n (%)          |                  |                  | 0.85             |

|     |         |          |
|-----|---------|----------|
| Yes | 32 (50) | 8 (57.1) |
|-----|---------|----------|

UKASP: "USFQ's Keys to Academic Success Program", IQR: Interquartile range  
 \*Continuous variables were analyzed by Wilcoxon Rank Sum Test and categorical data were analyzed through Chi-squared or Fisher's exact test as appropriate.

**Supplementary Table S2.** Comparison (median and IQR) between study participants with post-test scores vs. no post-test scores

| Scale | Post-test Yes | Post-test No     | <i>p</i> -Value* |
|-------|---------------|------------------|------------------|
| ANX   | 35 (5-60)     | 10 (5-37.5)      | <0.001           |
| ATT   | 30 (10-50)    | 50 (27.5-60)     | <0.001           |
| CON   | 35 (15-60)    | 22.5 (10-41.3)   | <0.001           |
| INP   | 55 (35-80)    | 47.5 (35-76.3)   | <0.001           |
| MOT   | 45 (25-80)    | 40 (8.8-68.8)    | <0.001           |
| SFT   | 60 (25-75)    | 57.5 (12.5-85)   | <0.001           |
| SMI   | 35 (20-70)    | 35 (12.5-66.2)   | <0.001           |
| STA   | 30 (15-60)    | 32.5 (13.7-76.2) | <0.001           |
| TMT   | 25 (10-45)    | 25 (5-65)        | <0.001           |
| TST   | 45 (20-60)    | 22.5 (7.8-56.2)  | <0.001           |

ANX, Anxiety; ATT, Attitude; CON, Concentration; INP, Information Processing; MOT, Motivation; SFT, Self-Testing; SMI, Selecting Main Ideas; STA, Study Aids; TMT, Time Management; TST, Test Strategies; IQR, Interquartile range. \*P-values were calculated by using Wilcoxon Rank Sum Test.

**Supplementary Table S3.** Sensitivity analysis with attendees that attended three or more workshops (n=26)

| Scale | Pre-test       | Post-test      | Percent change between pre-test and post-test* | p-Value <sup>†</sup> |
|-------|----------------|----------------|------------------------------------------------|----------------------|
| ANX   | 25 (5-53.7)    | 52.5 (30-72.5) | 110                                            | 0.02                 |
| ATT   | 17 (10-50)     | 50 (30-67.5)   | 194.1                                          | <0.01                |
| CON   | 25 (10-45)     | 50 (36.2-68.7) | 100                                            | <0.01                |
| INP   | 55 (40-78.7)   | 75 (56.2-85)   | 36.4                                           | 0.4                  |
| MOT   | 32.5 (25-65)   | 60 (45-80)     | 84.6                                           | 0.04                 |
| SFT   | 52.5 (21.2-75) | 67.5 (40-83.7) | 28.6                                           | 0.2                  |
| SMI   | 37.5 (20-77.5) | 52.5 (31.2-70) | 40                                             | 0.04                 |
| STA   | 25 (15-58.7)   | 50 (26.2-78.7) | 100                                            | 0.04                 |
| TMT   | 12.5 (10-35)   | 40 (35-65)     | 220                                            | <0.001               |
| TST   | 32.5 (16.2-70) | 70 (40-78.7)   | 115.4                                          | <0.01                |

\*Percent changes correspond to (Post-test value – Pre-test value)/ Pre-test value)\*100

<sup>†</sup>p-value calculated by Sign test

**Supplementary Table S4.** Sensitivity analysis with attendees that attended four or more workshops (n=8)

| Scale | Pre-test         | Post-test        | Percent change between pre-test and post-test* | p-Value <sup>†</sup> |
|-------|------------------|------------------|------------------------------------------------|----------------------|
| ANX   | 35 (26.2-71.2)   | 60 (30-70)       | 71.4                                           | 0.73                 |
| ATT   | 20 (8.7-37.5)    | 40 (25-52.5)     | 100                                            | 0.28                 |
| CON   | 17.5 (5-31.2)    | 47.5 (35-71.2)   | 171.4                                          | 0.07                 |
| INP   | 50 (32.5-56.2)   | 67.5 (55-77.5)   | 35                                             | 0.29                 |
| MOT   | 27.5 (18.7-46.2) | 60 (41.2-72.5)   | 118.2                                          | 0.07                 |
| SFT   | 37.5 (21.2-60)   | 52.5 (38.7-70)   | 40                                             | 0.29                 |
| SMI   | 25 (18.7-43.7)   | 42.5 (35-70)     | 70                                             | 0.07                 |
| STA   | 25 (18.7-32.5)   | 47.5 (36.2-61.2) | 90                                             | 0.29                 |
| TMT   | 10 (1-12.5)      | 40 (28.7-55)     | 300                                            | <0.01                |
| TST   | 17.5 (13.7-36.2) | 65 (43.7-71.2)   | 271.4                                          | 0.07                 |

\*Percent changes correspond to (Post-test value – Pre-test value)/ Pre-test value)\*100

<sup>†</sup>p-value calculated by Exact Binomial Sign test due to the small sample size (<20)

**Supplementary Figure S1.** Timeline of the UKASP research project execution during the academic year 2019-2020

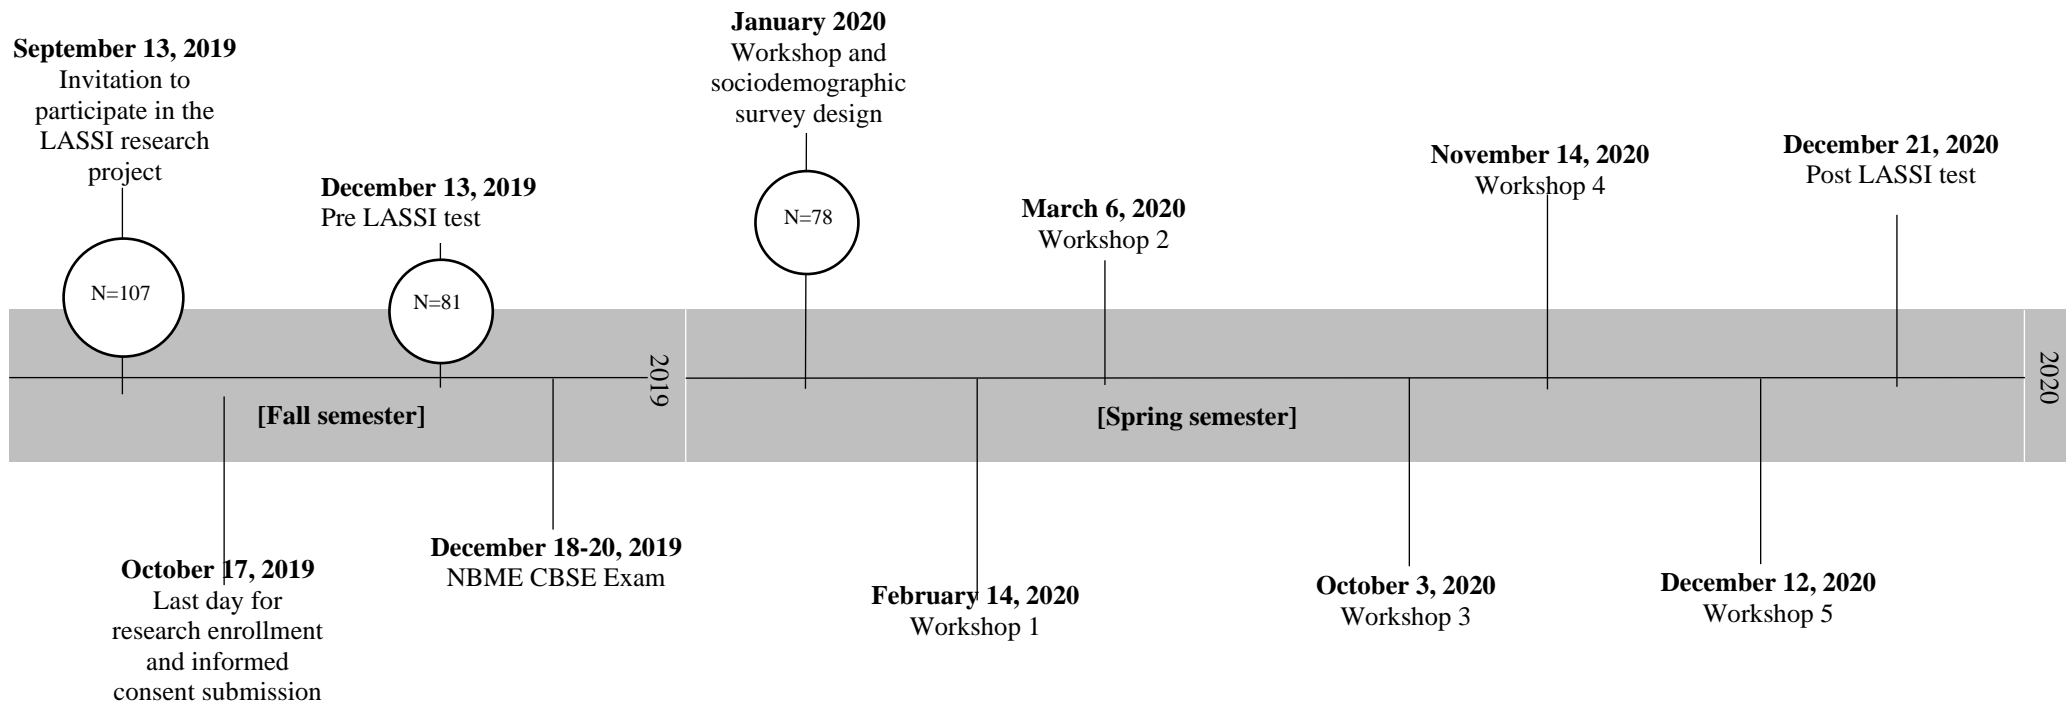

Supplement: s1 [file s1]
